# Supplementary material for: Neurological complications after first dose of COVID-19 vaccines and SARS-CoV-2 infection
Source: Springer Nature journal article supplement (doi:10.1038/s41591-021-01556-7), 2021-10-25
Supplement: 41591_2021_1556_MOESM1_ESM.pdf [file 41591_2021_1556_MOESM1_ESM.pdf]

**Supplementary information**

---

**Neurological complications after first dose of COVID-19 vaccines and SARS-CoV-2 infection**

---

In the format provided by the authors and unedited

**Supplementary table 1: Incidence rate ratios (IRR 95% CI) for Bell's palsy excluding patients who had a suspected concurrent diagnosis of cerebral infarction in pre-defined risk period (1-28 days) immediately before and after exposure to vaccination and before and after a Positive SARS-CoV-2 test result, adjusted for calendar time from 1 December 2020 until 31 May 2021 (cells with < 5 are suppressed).**

|                     | Time period    | ChAdOx1nCoV-19 vaccine |                   | BNT162b2 mRNA vaccine |                   | Positive SARS-CoV-2 test |                      |
|---------------------|----------------|------------------------|-------------------|-----------------------|-------------------|--------------------------|----------------------|
|                     |                | events                 | IRR (95% CI)      | events                | IRR (95% CI)      | events                   | IRR (95% CI)         |
| <b>Bell's palsy</b> | Baseline       | 1269                   | 1.00              | 674                   | 1.00              | 184                      | 1.00                 |
|                     | -28 to -1 days | 303                    | 0.79 (0.70, 0.90) | 160                   | 0.78 (0.65, 0.94) | 74                       | 3.12 (2.29, 4.25)    |
|                     | 0 day          | *                      | 0.28 (0.11, 0.76) | *                     | 0.39 (0.12, 1.20) | 34                       | 35.18 (23.70, 52.24) |
|                     | 1-7 days       | 87                     | 0.87 (0.70, 1.09) | 51                    | 0.92 (0.68, 1.23) | 43                       | 6.25 (4.35, 8.98)    |
|                     | 8-14 days      | 81                     | 0.81 (0.64, 1.02) | 53                    | 0.93 (0.70, 1.24) | 17                       | 2.38 (1.42, 3.99)    |
|                     | 15-21 days     | 132                    | 1.33 (1.10, 1.60) | 61                    | 1.04 (0.79, 1.37) | 8                        | 1.06 (0.51, 2.17)    |
|                     | 22-28 days     | 110                    | 1.14 (0.93, 1.40) | 70                    | 1.22 (0.97, 1.57) | 5                        | 0.62 (0.25, 1.51)    |

**Supplementary table 2: Incidence rate ratios (IRR 95% CI) of the combined occurrence of Guillain-Barre syndrome and Bell's palsy in pre-defined risk periods immediately before and after exposure to vaccination and before and after a positive SARS-CoV-2 test result, adjusted for calendar time from 1 December 2020 to 31 May 2021 (cells with < 5 are suppressed).**

|                                        | Time period    | ChAdOx1nCoV-19 vaccine |                     | BNT162b2 mRNA vaccine |              | Positive SARS-CoV-2 test |              |
|----------------------------------------|----------------|------------------------|---------------------|-----------------------|--------------|--------------------------|--------------|
|                                        |                | events                 | IRR (95% CI)        | events                | IRR (95% CI) | events                   | IRR (95% CI) |
| <b>Guillain-Barre and Bell's palsy</b> | Baseline       | 12                     | 1.00                | 34                    | 1.00         | 31                       | 1.00         |
|                                        | -28 to -1 days | *                      | 0.76 (0.04, 16.09)  | 0                     | n/a          | 1                        | n/a          |
|                                        | 0 day          | *                      | n/a                 | 0                     | n/a          | 0                        | n/a          |
|                                        | 1-28 days      | 21                     | 12.66 (2.70, 59.21) | 0                     | n/a          | 2                        | n/a          |

|                                        |                |    |                      |    |      |    |      |
|----------------------------------------|----------------|----|----------------------|----|------|----|------|
| <b>Guillain-Barre and Bell's palsy</b> | Baseline       | 12 | 1.00                 | 34 | 1.00 | 31 | 1.00 |
|                                        | -28 to -1 days | *  | 0.70 (0.03, 14.93)   | 0  | n/a  | *  | n/a  |
|                                        | 0 day          | *  | n/a                  | 0  | n/a  | 0  | n/a  |
|                                        | 1-7 days       | 0  | n/a                  | 0  | n/a  | 0  | n/a  |
|                                        | 8-14 days      | 0  | n/a                  | 0  | n/a  | 0  | n/a  |
|                                        | 15-21 days     | 13 | 28.86 (5.45, 152.74) | 0  | n/a  | *  | n/a  |
|                                        | 22-28 days     | 8  | 13.35 (2.48, 72.92)  | 0  | n/a  | *  | n/a  |

**Supplementary table 3a: Baseline demographic characteristics of people receiving either ChAdOx1nCoV-19 or BNT162b2 vaccines or testing positive to SARS-CoV-2 virus (in those vaccinated with either vaccine), in Scotland between 1 December 2020 until 31 May 2021. Figures are column % (counts).**

|                        | <b>ChAdOx1nCoV-19 vaccine</b> | <b>BNT162b2 mRNA vaccine</b> | <b>Positive SARS-CoV-2 test (amongst vaccinated)</b> |
|------------------------|-------------------------------|------------------------------|------------------------------------------------------|
|                        | <i>Col % (counts)</i>         | <i>Col % (counts)</i>        | <i>Col % (counts)</i>                                |
| Total number of people | 1982678                       | 1077626                      | 117554                                               |
| <b>Sex</b>             |                               |                              |                                                      |
| Number of women        | 50.7 (1005836)                | 59.1 (637102)                | 58.6 (68941)                                         |
| Number of men          | 49.3 (976842)                 | 40.9 (440524)                | 41.4 (48613)                                         |
| <b>Age</b>             |                               |                              |                                                      |
| 16-29 years            | 4.00 (79133)                  | 10.9 (117779)                | 11.0 (12976)                                         |
| 30-39 years            | 7.5 (148417)                  | 16.4 (177002)                | 14.2 (16709)                                         |
| 40-49 years            | 18.7 (371830)                 | 17.3 (186315)                | 21.4 (25133)                                         |
| 50-59 years            | 29.0 (574910)                 | 13.7 (148197)                | 26.3 (30939)                                         |
| 60-69 years            | 18.4 (364418)                 | 22.0 (236708)                | 13.0 (15299)                                         |
| 70-79 years            | 13.1 (259069)                 | 16.2 (175170)                | 7.0 (8187)                                           |
| 80-89 years            | 8.2 (163025)                  | 2.6 (28396)                  | 5.4 (6317)                                           |
| 90+ years              | 1.1 (21876)                   | 0.7 (8059)                   | 1.7 (1994)                                           |



|                                             |                |     |                   |     |                   |    |                    |    |                      |
|---------------------------------------------|----------------|-----|-------------------|-----|-------------------|----|--------------------|----|----------------------|
| <b>Encephalitis meningitis and myelitis</b> | Baseline       | 71  | 1.00              | 52  | 1.00              | 19 | 1.00               | 6  | 1.00                 |
|                                             | -28 to -1 days | 6   | 0.25 (0.10, 0.59) | 6   | 0.36 (0.14, 0.87) | *  | n/a                | *  | n/a                  |
|                                             | 0 day          | *   | n/a               | *   | n/a               | *  | n/a                | *  | n/a                  |
|                                             | 1-28 days      | 14  | 0.6 (0.32, 1.14)  | 9   | 0.61 (0.27, 1.35) | 5  | 0.75 (0.22, 2.47)  | *  | 0.63 (0.07, 5.35)    |
| <b>Guillain-Barre</b>                       | Baseline       | 21  | 1.00              | 19  | 1.00              | *  | 1.00               | *  | 1.00                 |
|                                             | -28 to -1 days | *   | n/a               | *   | n/a               | *  | n/a                | *  | n/a                  |
|                                             | 0 day          | *   | n/a               | *   | n/a               | *  | n/a                | *  | n/a                  |
|                                             | 1-28 days      | 19  | 2.32 (1.08, 5.02) | 17  | 2.31 (1.02, 5.24) | *  | 1.00 (0.02, 41.99) | *  | n/a                  |
| <b>Bell's palsy</b>                         | Baseline       | 98  | 1.00              | 74  | 1.00              | 24 | 1.00               | *  | 1.00                 |
|                                             | -28 to -1 days | 19  | 0.66 (0.39, 1.12) | 14  | 0.63 (0.34, 1.17) | 5  | 1.06 (0.35, 3.18)  | *  | 3.07 (0.27, 34.37)   |
|                                             | 0 day          | *   | 0.91 (0.12, 6.57) | *   | 1.15 (0.16, 8.43) | *  | n/a                | *  | 65.77 (5.96, 725.58) |
|                                             | 1-28 days      | 35  | 1.13 (0.73, 1.75) | 26  | 1.13 (0.68, 1.87) | 9  | 1.17 (0.44, 3.09)  | *  | 4.7 (0.66, 33.36)    |
| <b>Myasthenic disorder</b>                  | Baseline       | 40  | 1.00              | 28  | 1.00              | 12 | 1.00               | *  | 1.00                 |
|                                             | -28 to -1 days | 7   | 0.38 (0.14, 1.04) | *   | 0.24 (0.06, 0.91) | *  | n/a                | *  | n/a                  |
|                                             | 0 day          | *   | n/a               | *   | n/a               | *  | n/a                | *  | n/a                  |
|                                             | 1-28 days      | 11  | 0.46 (0.19, 1.13) | 10  | 0.52 (0.18, 1.52) | *  | n/a                | *  | n/a                  |
| <b>Haemorrhagic stroke</b>                  | Baseline       | 258 | 1.00              | 206 | 1.00              | 52 | 1.00               | 16 | 1.00                 |
|                                             | -28 to -1 days | 27  | 0.23 (0.15, 0.35) | 23  | 0.24 (0.15, 0.39) | *  | 0.16 (0.05, 0.48)  | 7  | 1.6 (0.64, 4.03)     |
|                                             | 0 day          | *   | 0.18 (0.03, 1.32) | *   | 0.24 (0.03, 1.74) | *  | n/a                | *  | 5.7 (0.75, 43.45)    |
|                                             | 1-28 days      | 98  | 0.64 (0.48, 0.85) | 73  | 0.63 (0.46, 0.87) | 25 | 0.65 (0.35, 1.2)   | *  | 0.7 (0.20, 2.41)     |
| <b>Subarachnoid haemorrhage</b>             | Baseline       | 159 | 1.00              | 118 | 1.00              | 41 | 1.00               | 12 | 1.00                 |
|                                             | -28 to -1 days | 17  | 0.22 (0.13, 0.37) | 16  | 0.3 (0.17, 0.53)  | *  | 0.05 (0.01, 0.4)   | *  | 1.56 (0.49, 4.94)    |
|                                             | 0 day          | *   | n/a               | *   | n/a               | *  | n/a                | *  | 29.84 (8.25, 107.93) |

|  |           |    |                  |    |                   |    |                 |   |     |
|--|-----------|----|------------------|----|-------------------|----|-----------------|---|-----|
|  | 1-28 days | 52 | 0.6 (0.42, 0.86) | 39 | 0.78 (0.51, 1.19) | 13 | 0.3 (0.13, 0.7) | * | n/a |
|--|-----------|----|------------------|----|-------------------|----|-----------------|---|-----|

**Supplementary table 3c: Incidence rate ratios (IRR 95% CI) for Guillain-Barre syndrome in pre-defined risk periods immediately before and after exposure to vaccination and before and after a Positive SARS-CoV-2 test result, adjusted for calendar time from 1 December 2020 until 31 May 2021 using Scottish national data (cells with < 5 are suppressed).**

|                       | Time period    | Either vaccine |                    | ChAdOx1nCoV-19 vaccine |                    | BNT162b2 mRNA vaccine |              | Positive SARS-CoV-2 test |              |
|-----------------------|----------------|----------------|--------------------|------------------------|--------------------|-----------------------|--------------|--------------------------|--------------|
|                       |                | events         | IRR (95% CI)       | events                 | IRR (95% CI)       | events                | IRR (95% CI) | events                   | IRR (95% CI) |
| <b>Guillain-Barre</b> | Baseline       | 21             | 1.00               | 19                     | 1.00               | *                     | 1.00         | *                        | 1.00         |
|                       | -28 to -1 days | *              | n/a                | *                      | n/a                | *                     | n/a          | *                        | n/a          |
|                       | 0 day          | *              | n/a                | *                      | n/a                | *                     | n/a          | *                        | n/a          |
|                       | 1-7 days       | *              | n/a                | *                      | n/a                | *                     | n/a          | *                        | n/a          |
|                       | 8-14 days      | *              | 1.91 (0.58, 6.27)  | *                      | 2.15 (0.63, 7.31)  | *                     | n/a          | *                        | n/a          |
|                       | 15-21 days     | 10             | 5.35 (2.09, 13.70) | 8                      | 4.79 (1.72, 13.38) | *                     | n/a          | *                        | n/a          |
|                       | 22-28 days     | 5              | 3.40 (1.09, 10.65) | 5                      | 3.60 (1.11, 11.65) | *                     | n/a          | *                        | n/a          |

**Supplementary table 4a: Likelihood ratio test statistic and p-value to test interaction between vaccine type and age group or sex. Interaction term was tested only when the main exposure (vaccine) was found to be significant (cells with < 5 are suppressed).**

|                                                 | Likelihood ratio test (df = 6) |                            |
|-------------------------------------------------|--------------------------------|----------------------------|
|                                                 | with ChAdOx1nCoV-19 vaccine    | with BNT162b2 mRNA vaccine |
| <b>Interaction with age group (≤50, &gt;50)</b> |                                |                            |
| CNS Demyelinating disorder                      | -                              | -                          |
| Encephalitis meningitis and myelitis            | 7.47 (0.279)                   | -                          |
| Guillain-Barre                                  | 1.88 (0.930)                   | -                          |
| Bell's palsy                                    | 3.37 (0.761)                   | -                          |
| Myasthenic disorder                             | 15.57 (0.016)                  | -                          |
| Haemorrhagic stroke                             | -                              | 8.24 (0.221)               |

|                                      |              |               |
|--------------------------------------|--------------|---------------|
| Subarachnoid haemorrhage             | -            | -             |
| <b>Interaction with sex</b>          |              | -             |
| CNS Demyelinating disorder           | -            | -             |
| Encephalitis meningitis and myelitis | 5.30 (0.506) | -             |
| Guillain-Barre                       | 4.43 (0.618) | -             |
| Bell's palsy                         | 7.02 (0.319) | -             |
| Myasthenic disorder                  | 5.57 (0.473) | -             |
| Haemorrhagic stroke                  | -            | 17.72 (0.007) |
| Subarachnoid haemorrhage             | -            | -             |

**Supplementary table 4b: Incidence rate ratios (IRR 95% CI) by age groups or sex for the outcomes in pre-defined risk periods immediately before and after exposure to vaccination and before and after a positive SARS-CoV-2 test result, adjusted for calendar time from 1 December 2020 to 31 May 2021 (cells with < 5 are suppressed).**

|                                   | Time period    | ChAdOx1nCoV-19 vaccine |                   | BNT162b2 mRNA vaccine |                   | Positive SARS-CoV-2 test |                       |
|-----------------------------------|----------------|------------------------|-------------------|-----------------------|-------------------|--------------------------|-----------------------|
|                                   |                | events                 | IRR (95% CI)      | events                | IRR (95% CI)      | events                   | IRR (95% CI)          |
| <b>Interaction with age group</b> |                |                        |                   |                       |                   |                          |                       |
| <b>Myasthenic disorder</b>        |                |                        |                   |                       |                   |                          |                       |
| <b>Age ≤ 50</b>                   | baseline       | 44                     | 1.00              | 29                    | 1.00              | 8                        | 1.00                  |
|                                   | -28 to -1 days | 12                     | 1.09 (0.54, 2.17) | 9                     | 1.39 (0.63, 3.09) | *                        | 0.77 (0.09, 6.50)     |
|                                   | 0 day          | 0                      | n/a               | 0                     | n/a               | *                        | 17.43 (2.04, 148.80)  |
|                                   | 1-7 days       | 0                      | n/a               | *                     | 1.81 (0.51, 6.45) | 5                        | 11.20 (3.29, 38.07)   |
|                                   | 8-14 days      | *                      | n/a               | *                     | 1.83 (0.52, 6.47) | 0                        | n/a                   |
|                                   | 15-21 days     | 8                      | 2.44 (1.07, 5.55) | *                     | 1.62 (0.36, 7.23) | *                        | 2.09 (0.25, 17.44)    |
|                                   | 22-28 days     | *                      | 0.84 (0.25, 2.81) | *                     | 1.26 (0.29, 5.56) | *                        | 1.97 (0.24, 16.13)    |
| <b>Age &gt; 50</b>                | baseline       | 267                    | 1.00              | 184                   | 1.00              | 24                       | 1.00                  |
|                                   | -28 to -1 days | 58                     | 0.65 (0.47, 0.90) | 35                    | 0.49 (0.33, 0.72) | 25                       | 4.75 (2.62, 8.64)     |
|                                   | 0 day          | 0                      | n/a               | *                     | 0.98 (0.31, 3.12) | 17                       | 70.94 (36.93, 136.28) |

|                             |                |     |                   |     |                   |    |                     |
|-----------------------------|----------------|-----|-------------------|-----|-------------------|----|---------------------|
|                             | 1-7 days       | 17  | 0.76 (0.45, 1.29) | 15  | 0.71 (0.41, 1.24) | 24 | 13.90 (7.66, 25.24) |
|                             | 8-14 days      | 26  | 1.28 (0.82, 1.97) | 21  | 0.99 (0.61, 1.60) | 9  | 4.92 (2.24, 10.83)  |
|                             | 15-21 days     | 25  | 1.34 (0.86, 2.07) | 20  | 0.94 (0.57, 1.53) | *  | 2.16 (0.74, 6.29)   |
|                             | 22-28 days     | 20  | 1.00 (0.62, 1.62) | 25  | 1.40 (0.90, 2.16) | 5  | 2.97 (1.12, 7.87)   |
| <b>Interaction with sex</b> |                |     |                   |     |                   |    |                     |
| <b>Haemorrhagic stroke</b>  |                |     |                   |     |                   |    |                     |
| <b>Female</b>               | baseline       | 695 | 1.00              | 401 | 1.00              | 95 | 1.00                |
|                             | -28 to -1 days | 109 | 0.49 (0.39, 0.60) | 30  | 0.27 (0.18, 0.39) | 80 | 4.69 (3.35, 6.57)   |
|                             | 0 day          | 6   | 0.69 (0.31, 1.55) | *   | 0.42 (0.10, 1.69) | 9  | 11.12 (5.52, 22.40) |
|                             | 1-7 days       | 63  | 1.03 (0.78, 1.34) | 50  | 1.44 (1.05, 1.96) | 11 | 1.90 (1.00, 3.61)   |
|                             | 8-14 days      | 89  | 1.44 (1.14, 1.82) | 44  | 1.23 (0.89, 1.71) | 7  | 1.16 (0.53, 2.53)   |
|                             | 15-21 days     | 70  | 1.14 (0.88, 1.47) | 67  | 1.84 (1.40, 2.42) | 5  | 0.84 (0.34, 2.07)   |
|                             | 22-28 days     | 66  | 1.10 (0.85, 1.44) | 49  | 1.30 (0.96, 1.77) | *  | 0.52 (0.16, 1.64)   |
| <b>Male</b>                 | baseline       | 760 | 1.00              | 409 | 1.00              | 78 | 1.00                |
|                             | -28 to -1 days | 123 | 0.46 (0.38, 0.57) | 56  | 0.46 (0.34, 0.61) | 83 | 4.99 (3.53, 7.04)   |
|                             | 0 day          | *   | 0.10 (0.01, 0.70) | *   | 0.76 (0.28, 2.04) | 11 | 14.41 (7.54, 27.52) |
|                             | 1-7 days       | 68  | 0.95 (0.73, 1.23) | 43  | 1.13 (0.82, 1.57) | 12 | 2.24 (1.20, 4.18)   |
|                             | 8-14 days      | 52  | 0.73 (0.55, 0.98) | 45  | 1.13 (0.82, 1.56) | 7  | 1.26 (0.58, 2.76)   |
|                             | 15-21 days     | 58  | 0.84 (0.63, 1.10) | 39  | 0.98 (0.70, 1.38) | 5  | 0.87 (0.35, 2.17)   |
|                             | 22-28 days     | 60  | 0.91 (0.70, 1.20) | 42  | 1.03 (0.74, 1.42) | *  | 0.52 (0.16, 1.66)   |

**Supplementary table 5: Measures of effect of vaccinations and SARS-CoV-2 infections presented in absolute terms, number needed to expose for one excess event; excess events due to exposure; excess events per 10 million exposed. Only associations significant at the 0.01 level were reported over the 1-28 days post exposure. When IRR were not significant over the 1-28 days post-vaccine, absolute measures were not given.**



|                                             | <b>IRR (95% CI)<br/>1-28 days*</b> | <b>Number needed to expose to cause<br/>one excess event (95% CI)</b> | <b>Excess events per 10,000,000<br/>exposed (95% CI)</b> |
|---------------------------------------------|------------------------------------|-----------------------------------------------------------------------|----------------------------------------------------------|
| <b>CNS Demyelinating disorder</b>           |                                    |                                                                       |                                                          |
| with ChAdOx1nCoV-19 vaccine                 | 0.97 (0.78, 1.22)                  | -                                                                     | -                                                        |
| with BNT162b2 mRNA vaccine                  | 1.02 (0.75, 1.40)                  | -                                                                     | -                                                        |
| with SARS-CoV-2 infection                   | 1.67 (0.93, 3.00)                  | -                                                                     | -                                                        |
| <b>Encephalitis meningitis and myelitis</b> |                                    |                                                                       |                                                          |
| with ChAdOx1nCoV-19 vaccine                 | 1.07 (0.87, 1.31)                  | -                                                                     | -                                                        |
| with BNT162b2 mRNA vaccine                  | 1.14 (0.86, 1.51)                  | -                                                                     | -                                                        |
| with SARS-CoV-2 infection                   | 2.70 (1.78, 4.11)                  | 81166 (44168, 76269)                                                  | 123 (131, 226)                                           |
| <b>Guillain-Barre</b>                       |                                    |                                                                       |                                                          |
| with ChAdOx1nCoV-19 vaccine                 | 2.04 (1.60, 2.60)                  | 261766 (216855, 355865)                                               | 38 (28, 46)                                              |
| with BNT162b2 mRNA vaccine                  | 0.86 (0.54, 1.36)                  | -                                                                     | -                                                        |
| with SARS-CoV-2 infection                   | 5.25 (3.00, 9.18)                  | 68809 (62512, 83526)                                                  | 145 (120, 160)                                           |
| <b>Bell's palsy</b>                         |                                    |                                                                       |                                                          |
| with ChAdOx1nCoV-19 vaccine                 | 1.07 (0.94, 1.21)                  | -                                                                     | -                                                        |
| with BNT162b2 mRNA vaccine                  | 1.06 (0.90, 1.26)                  | -                                                                     | -                                                        |
| with SARS-CoV-2 infection                   | 1.34 (0.91, 1.97)                  | -                                                                     | -                                                        |
| <b>Myasthenic disorder</b>                  |                                    |                                                                       |                                                          |
| with ChAdOx1nCoV-19 vaccine                 | 1.23 (0.94, 1.62)                  | -                                                                     | -                                                        |
| with BNT162b2 mRNA vaccine                  | 1.18 (0.88, 1.59)                  | -                                                                     | -                                                        |
| with SARS-CoV-2 infection                   | 3.01 (1.70, 5.36)                  | 61284 (50310, 99387)                                                  | 163 (101, 199)                                           |
| <b>Haemorrhagic stroke</b>                  |                                    |                                                                       |                                                          |
| with ChAdOx1nCoV-19 vaccine                 | 1.02 (0.90, 1.15)                  | -                                                                     | -                                                        |
| with BNT162b2 mRNA vaccine                  | 1.24 (1.07, 1.43)                  | 165426 (106478, 489416)                                               | 60 (20, 94)                                              |
| with SARS-CoV-2 infection                   | 0.85 (0.57, 1.26)                  | -                                                                     | -                                                        |
| <b>Subarachnoid haemorrhage</b>             |                                    |                                                                       |                                                          |
| with ChAdOx1nCoV-19 vaccine                 | 1.01 (0.86, 1.18)                  | -                                                                     | -                                                        |
| with BNT162b2 mRNA vaccine                  | 1.05 (0.84, 1.30)                  | -                                                                     | -                                                        |
| with SARS-CoV-2 infection                   | 1.51 (0.96, 2.36)                  | -                                                                     | -                                                        |

**Supplementary Table 6: Incidence rate ratios (IRR 95% CI) for celiac disease (negative control) and anaphylaxis (positive control) in pre-defined risk periods immediately before and after exposure to vaccination and before and after a positive SARS-CoV-2 result, adjusted for calendar time from 1 December 2020 to 31 Maggio 2021 (cells with < 5 are suppressed).**

|                               |                    | Celiac disease (negative control) |                      | Anaphylaxis (positive control) |                      |
|-------------------------------|--------------------|-----------------------------------|----------------------|--------------------------------|----------------------|
|                               |                    | events                            | IRR (95% CI)         | events                         | IRR (95% CI)         |
| <b>Group</b>                  | <b>Time period</b> |                                   |                      |                                |                      |
| <b>ChAdOx1nCoV-19 vaccine</b> | baseline           | 2403                              | 1.00                 | 438                            | 1.00                 |
|                               | -28 to -1 days     | 715                               | 0.95 (0.87, 1.04)    | 111                            | 0.82 (0.66, 1.02)    |
|                               | 0 day              | *                                 | 0.07 (0.02, 0.29)    | 47                             | 9.68 (7.08, 13.24)   |
|                               | 1-7 days           | 164                               | 0.84 (0.72, 0.99)    | 52                             | 1.55 (1.15, 2.09)    |
|                               | 8-14 days          | 196                               | 1.01 (0.87, 1.17)    | 25                             | 0.74 (0.49, 1.11)    |
|                               | 15-21 days         | 184                               | 0.97 (0.83, 1.13)    | 36                             | 1.05 (0.74, 1.49)    |
|                               | 22-28 days         | 183                               | 0.99 (0.85, 1.16)    | 26                             | 0.78 (0.52, 1.18)    |
| <b>BNT162b2 mRNA vaccine</b>  | baseline           | 1610                              | 1.00                 | 167                            | 1.00                 |
|                               | -28 to -1 days     | 437                               | 0.88 (0.79, 0.98)    | 31                             | 0.73 (0.49, 1.08)    |
|                               | 0 day              | 5                                 | 0.27 (0.11, 0.65)    | 29                             | 19.31 (12.77, 29.19) |
|                               | 1-7 days           | 98                                | 0.75 (0.61, 0.92)    | 16                             | 1.50 (0.89, 2.55)    |
|                               | 8-14 days          | 121                               | 0.90 (0.75, 1.09)    | 22                             | 1.99 (1.25, 3.17)    |
|                               | 15-21 days         | 122                               | 0.89 (0.73, 1.07)    | 12                             | 1.10 (0.60, 2.00)    |
|                               | 22-28 days         | 116                               | 0.86 (0.71, 1.05)    | 11                             | 0.99 (0.53, 1.84)    |
| <b>SARS-CoV-2</b>             | baseline           | 207                               | 1.00                 | 59                             | 1.00                 |
|                               | -28 to -1 days     | 89                                | 2.08 (1.60, 2.70)    | 16                             | 1.49 (0.83, 2.67)    |
|                               | 0 day              | 42                                | 25.62 (18.22, 36.03) | 11                             | 25.81 (13.25, 50.30) |
|                               | 1-7 days           | 69                                | 5.91 (4.45, 7.84)    | 8                              | 2.68 (1.26, 5.70)    |
|                               | 8-14 days          | 53                                | 4.33 (3.18, 5.90)    | *                              | 0.67 (0.16, 2.76)    |

|  |            |    |                   |   |                   |
|--|------------|----|-------------------|---|-------------------|
|  | 15-21 days | 18 | 1.38 (0.85, 2.25) | * | 0.95 (0.30, 3.07) |
|  | 22-28 days | 19 | 1.35 (0.84, 2.16) | 6 | 1.77 (0.76, 4.13) |

**Supplementary table 7a: Incidence rate ratios (IRR 95% CI) for single outcomes in pre-defined risk periods immediately before and after exposure to vaccination, adjusted for calendar time from 1 December 2020 to 31 May 2021. Comparisons between different sensitivity analyses (cells with < 5 are suppressed).**

|                                        |                   | Main   |                      | Sensitivity 1* |                      | Sensitivity 2* |              | Sensitivity 3* |                      | Sensitivity 4* |                       | Sensitivity 5* |                      |
|----------------------------------------|-------------------|--------|----------------------|----------------|----------------------|----------------|--------------|----------------|----------------------|----------------|-----------------------|----------------|----------------------|
|                                        |                   | events | IRR (95% CI)         | events         | IRR (95% CI)         | events         | IRR (95% CI) | events         | IRR (95% CI)         | events         | IRR (95% CI)          | events         | IRR (95% CI)         |
| <b>CNS Demyelinating disorder°</b>     |                   |        |                      |                |                      |                |              |                |                      |                |                       |                |                      |
| <b>ChAdOx1nC<br/>oV-19<br/>vaccine</b> | Baseline          | 473    | 1.00                 | 473            | 1.00                 |                |              | 464            | 1.00                 | 174            | 1.00                  | 473            | 1.00                 |
|                                        | -28 to -1<br>days | 117    | 0.83<br>(0.67, 1.03) | 117            | 0.83<br>(0.67, 1.03) |                |              | 117            | 0.83<br>(0.67, 1.03) | 43             | 0.71<br>(0.50, 1.03)  | 117            | 0.82<br>(0.66, 1.02) |
|                                        | 0 day             | 0      | n/a                  | 0              | n/a                  |                |              | 0              | n/a                  | 0              | n/a                   | 0              | n/a                  |
|                                        | 1-7 days          | 38     | 1.03<br>(0.73, 1.44) | 38             | 1.02<br>(0.73, 1.44) |                |              | 37             | 1.01<br>(0.71, 1.42) | 16             | 1.11<br>(0.64, 1.91)  | 38             | 1.02<br>(0.73, 1.44) |
|                                        | 8-14 days         | 35     | 0.95<br>(0.67, 1.36) | 35             | 0.95<br>(0.67, 1.35) |                |              | 35             | 0.96<br>(0.67, 1.37) | 11             | 0.81<br>(0.43, 1.54)  | 35             | 0.95<br>(0.67, 1.35) |
|                                        | 15-21 days        | 38     | 1.04<br>(0.74, 1.46) | 38             | 1.04<br>(0.74, 1.46) |                |              | 38             | 1.04<br>(0.74, 1.46) | 16             | 1.25<br>(0.73, 2.17)  | 38             | 1.03<br>(0.73, 1.45) |
|                                        | 22-28 days        | 33     | 0.93<br>(0.65, 1.33) | 33             | 0.93<br>(0.64, 1.33) |                |              | 32             | 0.90<br>(0.62, 1.30) | 13             | 1.13<br>(0.62, 2.05)  | 33             | 0.92<br>(0.64, 1.32) |
| <b>BNT162b2<br/>mRNA<br/>vaccine</b>   | Baseline          | 244    | 1.00                 | 242            | 1.00                 |                |              | 240            | 1.00                 | 81             | 1.00                  | 242            | 1.00                 |
|                                        | -28 to -1<br>days | 58     | 0.92<br>(0.68, 1.24) | 58             | 0.93<br>(0.69, 1.25) |                |              | 58             | 0.93<br>(0.69, 1.26) | 6              | 0.47<br>(0.20, 1.10)  | 58             | 0.91<br>(0.67, 1.23) |
|                                        | 0 day             | *      | 0.43<br>(0.06, 3.05) | *              | 0.43<br>(0.06, 3.09) |                |              | *              | 0.43<br>(0.06, 3.11) | *              | 2.61<br>(0.36, 19.13) | *              | 0.42<br>(0.06, 3.02) |
|                                        | 1-7 days          | 15     | 0.91<br>(0.53, 1.55) | 15             | 0.92<br>(0.54, 1.57) |                |              | 15             | 0.93<br>(0.54, 1.58) | *              | 0.37<br>(0.05, 2.72)  | 15             | 0.90<br>(0.53, 1.53) |
|                                        | 8-14 days         | 16     | 0.94<br>(0.56, 1.58) | 15             | 0.89<br>(0.52, 1.51) |                |              | 16             | 0.95<br>(0.57, 1.60) | 5              | 1.89<br>(0.73, 4.89)  | 16             | 0.93<br>(0.55, 1.56) |
|                                        | 15-21 days        | 16     | 0.92                 | 16             | 0.93                 |                |              | 16             | 0.93                 | *              | 1.53                  | 16             | 0.91                 |

|                                             |                   |     |                      |     |                      |     |                      |     |                      |     |                      |     |                      |
|---------------------------------------------|-------------------|-----|----------------------|-----|----------------------|-----|----------------------|-----|----------------------|-----|----------------------|-----|----------------------|
|                                             |                   |     | (0.55, 1.55)         |     | (0.55, 1.56)         |     |                      |     | (0.56, 1.57)         |     | (0.54, 4.38)         |     | (0.54, 1.53)         |
|                                             | 22-28 days        | 21  | 1.19<br>(0.75, 1.89) | 21  | 1.20<br>(0.76, 1.90) |     |                      | 21  | 1.20<br>(0.76, 1.90) | *   | 1.14<br>(0.35, 3.76) | 21  | 1.18<br>(0.74, 1.86) |
| <b>Encephalitis meningitis and myelitis</b> |                   |     |                      |     |                      |     |                      |     |                      |     |                      |     |                      |
| <b>ChAdOx1nC<br/>oV-19<br/>vaccine</b>      | Baseline          | 602 | 1.00                 | 586 | 1.00                 | 171 | 1.00                 | 594 | 1.00                 | 291 | 1.00                 | 599 | 1.00                 |
|                                             | -28 to -1<br>days | 78  | 0.42<br>(0.33, 0.54) | 78  | 0.43<br>(0.34, 0.56) |     |                      | 78  | 0.42<br>(0.33, 0.54) | 25  | 0.31<br>(0.20, 0.47) | 78  | 0.42<br>(0.33, 0.54) |
|                                             | 0 day             | *   | 0.46<br>(0.15, 1.43) | *   | 0.48<br>(0.15, 1.50) | *   | 0.34<br>(0.10, 1.11) | *   | 0.46<br>(0.15, 1.44) | *   | 0.36<br>(0.05, 2.59) | *   | 0.46<br>(0.15, 1.43) |
|                                             | 1-7 days          | 52  | 1.15<br>(0.85, 1.54) | 47  | 1.09<br>(0.80, 1.49) | 52  | 0.86<br>(0.55, 1.35) | 52  | 1.16<br>(0.86, 1.56) | 28  | 1.48<br>(0.98, 2.23) | 52  | 1.14<br>(0.85, 1.54) |
|                                             | 8-14 days         | 58  | 1.32<br>(0.99, 1.76) | 57  | 1.38<br>(1.03, 1.84) | 58  | 1.06<br>(0.71, 1.58) | 58  | 1.34<br>(1.00, 1.78) | 34  | 1.84<br>(1.26, 2.70) | 58  | 1.32<br>(0.99, 1.75) |
|                                             | 15-21 days        | 37  | 0.89<br>(0.63, 1.25) | 37  | 0.94<br>(0.66, 1.32) | 37  | 0.76<br>(0.50, 1.15) | 37  | 0.90<br>(0.64, 1.27) | 14  | 0.81<br>(0.47, 1.41) | 37  | 0.88<br>(0.63, 1.25) |
|                                             | 22-28 days        | 38  | 0.96<br>(0.68, 1.35) | 36  | 0.96<br>(0.68, 1.37) | 38  | 0.86<br>(0.58, 1.26) | 38  | 0.97<br>(0.69, 1.37) | 22  | 1.41<br>(0.90, 2.23) | 38  | 0.95<br>(0.68, 1.34) |
| <b>BNT162b2<br/>mRNA<br/>vaccine</b>        | Baseline          | 275 | 1.00                 | 268 | 1.00                 | 135 | 1.00                 | 273 | 1.00                 | 120 | 1.00                 | 271 | 1.00                 |
|                                             | -28 to -1<br>days | 45  | 0.59<br>(0.42, 0.82) | 45  | 0.60<br>(0.43, 0.83) |     |                      | 45  | 0.59<br>(0.43, 0.83) | 8   | 0.45<br>(0.22, 0.95) | 45  | 0.58<br>(0.41, 0.80) |
|                                             | 0 day             | 0   | n/a                  | 0   | n/a                  | 0   | n/a                  | 0   | n/a                  | 0   | n/a                  | 0   | n/a                  |
|                                             | 1-7 days          | 22  | 1.02<br>(0.65, 1.61) | 20  | 0.95<br>(0.59, 1.52) | 22  | 0.64<br>(0.35, 1.18) | 22  | 1.03<br>(0.66, 1.62) | 9   | 2.01<br>(0.98, 4.13) | 22  | 1.00<br>(0.63, 1.56) |
|                                             | 8-14 days         | 27  | 1.17<br>(0.77, 1.77) | 25  | 1.10<br>(0.72, 1.69) | 27  | 0.81<br>(0.48, 1.38) | 27  | 1.18<br>(0.78, 1.78) | 8   | 1.65<br>(0.77, 3.51) | 27  | 1.14<br>(0.75, 1.73) |
|                                             | 15-21 days        | 21  | 0.95<br>(0.60, 1.50) | 19  | 0.88<br>(0.55, 1.43) | 21  | 0.69<br>(0.40, 1.17) | 21  | 0.96<br>(0.60, 1.51) | 11  | 2.32<br>(1.20, 4.51) | 21  | 0.93<br>(0.59, 1.47) |
|                                             | 22-28 days        | 27  | 1.28<br>(0.85, 1.93) | 25  | 1.22<br>(0.80, 1.87) | 27  | 0.96<br>(0.61, 1.53) | 27  | 1.28<br>(0.85, 1.93) | 9   | 1.92<br>(0.93, 3.93) | 27  | 1.25<br>(0.83, 1.88) |
| <b>Guillain-Barre°</b>                      |                   |     |                      |     |                      |     |                      |     |                      |     |                      |     |                      |
| <b>ChAdOx1nC<br/>oV-19<br/>vaccine</b>      | Baseline          | 264 | 1.00                 | 260 | 1.00                 |     |                      | 261 | 1.00                 | 101 | 1.00                 | 264 | 1.00                 |
|                                             | -28 to -1<br>days | 41  | 0.44<br>(0.31, 0.63) | 41  | 0.45<br>(0.32, 0.64) |     |                      | 41  | 0.44<br>(0.31, 0.63) | 10  | 0.29<br>(0.15, 0.57) | 41  | 0.45<br>(0.31, 0.63) |
|                                             | 0 day             | 0   | n/a                  | 0   | n/a                  |     |                      | 0   | n/a                  | 0   | n/a                  | 0   | n/a                  |

|                                |                |     |                      |     |                      |     |                      |     |                      |    |                      |     |                      |
|--------------------------------|----------------|-----|----------------------|-----|----------------------|-----|----------------------|-----|----------------------|----|----------------------|-----|----------------------|
|                                | 1-7 days       | 17  | 0.74<br>(0.44, 1.23) | 17  | 0.76<br>(0.46, 1.26) |     |                      | 17  | 0.73<br>(0.44, 1.22) | 7  | 0.84<br>(0.38, 1.84) | 17  | 0.74<br>(0.45, 1.23) |
|                                | 8-14 days      | 23  | 1.02<br>(0.65, 1.59) | 22  | 1.01<br>(0.64, 1.59) |     |                      | 23  | 1.01<br>(0.65, 1.58) | 14 | 1.72<br>(0.95, 3.11) | 23  | 1.02<br>(0.65, 1.60) |
|                                | 15-21 days     | 65  | 2.90<br>(2.15, 3.92) | 62  | 2.86<br>(2.11, 3.89) |     |                      | 64  | 2.84<br>(2.10, 3.84) | 51 | 6.55<br>(4.43, 9.69) | 65  | 2.90<br>(2.15, 3.91) |
|                                | 22-28 days     | 48  | 2.21<br>(1.59, 3.09) | 48  | 2.29<br>(1.64, 3.20) |     |                      | 48  | 2.20<br>(1.58, 3.07) | 30 | 4.15<br>(2.63, 6.56) | 48  | 2.20<br>(1.58, 3.07) |
| <b>BNT162b2 mRNA vaccine</b>   | Baseline       | 109 | 1.00                 | 107 | 1.00                 |     |                      | 108 | 1.00                 | 41 | 1.00                 | 108 | 1.00                 |
|                                | -28 to -1 days | 21  | 0.67<br>(0.41, 1.10) | 21  | 0.68<br>(0.41, 1.11) |     |                      | 21  | 0.68<br>(0.42, 1.12) | *  | 0.15<br>(0.02, 1.12) | 21  | 0.66<br>(0.40, 1.08) |
|                                | 0 day          | 0   | n/a                  | 0   | n/a                  |     |                      | 0   | n/a                  | 0  | n/a                  | 0   | n/a                  |
|                                | 1-7 days       | 9   | 0.99<br>(0.49, 2.00) | 9   | 1.01<br>(0.50, 2.05) |     |                      | 9   | 1.00<br>(0.49, 2.02) | *  | 1.50<br>(0.43, 5.19) | 9   | 0.97<br>(0.48, 1.96) |
|                                | 8-14 days      | 7   | 0.71<br>(0.32, 1.56) | 7   | 0.73<br>(0.33, 1.59) |     |                      | 7   | 0.72<br>(0.33, 1.57) | *  | 1.43<br>(0.41, 4.93) | 7   | 0.70<br>(0.32, 1.53) |
|                                | 15-21 days     | 9   | 0.91<br>(0.45, 1.84) | 9   | 0.94<br>(0.47, 1.89) |     |                      | 9   | 0.92<br>(0.46, 1.85) | *  | 0.94<br>(0.22, 4.08) | 9   | 0.90<br>(0.45, 1.80) |
|                                | 22-28 days     | 9   | 0.90<br>(0.45, 1.82) | 8   | 0.83<br>(0.40, 1.73) |     |                      | 9   | 0.91<br>(0.45, 1.82) | *  | 1.72<br>(0.57, 5.14) | 9   | 0.89<br>(0.44, 1.78) |
| <b>Myasthenic disorder</b>     |                |     |                      |     |                      |     |                      |     |                      |    |                      |     |                      |
| <b>ChAdOx1nC oV-19 vaccine</b> | Baseline       | 311 | 1.00                 | 302 | 1.00                 | 133 | 1.00                 | 309 | 1.00                 | 69 | 1.00                 | 309 | 1.00                 |
|                                | -28 to -1 days | 70  | 0.72<br>(0.54, 0.96) | 69  | 0.74<br>(0.55, 0.99) |     |                      | 70  | 0.72 (0.54, 0.96)    | 12 | 0.71 (0.37, 1.35)    | 70  | 0.73 (0.54, 0.97)    |
|                                | 0 day          | 0   | n/a                  | 0   | n/a                  | 0   | n/a                  | 0   | n/a                  | 0  | n/a                  | 0   | n/a                  |
|                                | 1-7 days       | 17  | 0.70<br>(0.42, 1.16) | 15  | 0.65<br>(0.38, 1.12) | 17  | 0.90 (0.47, 1.72)    | 17  | 0.70 (0.42, 1.16)    | *  | 0.44 (0.10, 1.89)    | 17  | 0.70 (0.42, 1.17)    |
|                                | 8-14 days      | 26  | 1.16<br>(0.76, 1.77) | 23  | 1.10<br>(0.70, 1.71) | 26  | 1.37<br>(0.80, 2.35) | 26  | 1.17<br>(0.76, 1.78) | 8  | 1.88<br>(0.86, 4.14) | 26  | 1.17<br>(0.77, 1.79) |
|                                | 15-21 days     | 33  | 1.57<br>(1.07, 2.30) | 33  | 1.66<br>(1.13, 2.43) | 33  | 1.77<br>(1.11, 2.83) | 33  | 1.58<br>(1.08, 2.31) | 6  | 1.71<br>(0.72, 4.10) | 33  | 1.58<br>(1.08, 2.32) |
|                                | 22-28 days     | 23  | 1.01<br>(0.65, 1.57) | 23  | 1.06<br>(0.68, 1.64) | 23  | 1.12<br>(0.69, 1.83) | 23  | 1.01<br>(0.65, 1.57) | 5  | 1.40<br>(0.54, 3.61) | 23  | 1.01<br>(0.65, 1.58) |
|                                | Baseline       | 213 | 1.00                 | 205 | 1.00                 | 132 | 1.00                 | 213 | 1.00                 | 38 | 1.00                 | 211 | 1.00                 |

|                                |                |      |                      |      |                      |     |                      |      |                      |     |                      |      |                      |
|--------------------------------|----------------|------|----------------------|------|----------------------|-----|----------------------|------|----------------------|-----|----------------------|------|----------------------|
| <b>BNT162b2 mRNA vaccine</b>   | -28 to -1 days | 44   | 0.58<br>(0.41, 0.83) | 44   | 0.61<br>(0.43, 0.86) |     |                      | 44   | 0.58<br>(0.41, 0.82) | 8   | 0.92<br>(0.41, 2.06) | 44   | 0.57<br>(0.41, 0.81) |
|                                | 0 day          | *    | 0.96<br>(0.30, 3.04) | *    | 1.01<br>(0.32, 3.20) | *   | 1.33<br>(0.37, 4.85) | *    | 0.96<br>(0.30, 3.03) | 0   | n/a                  | *    | 0.94<br>(0.30, 2.98) |
|                                | 1-7 days       | 18   | 0.83<br>(0.50, 1.37) | 16   | 0.79<br>(0.46, 1.34) | 18  | 1.04<br>(0.50, 2.13) | 18   | 0.83<br>(0.50, 1.37) | *   | 0.98<br>(0.28, 3.43) | 18   | 0.81<br>(0.49, 1.34) |
|                                | 8-14 days      | 24   | 1.09<br>(0.70, 1.71) | 23   | 1.13<br>(0.71, 1.78) | 24  | 1.21<br>(0.65, 2.24) | 24   | 1.09<br>(0.70, 1.71) | *   | 1.09<br>(0.31, 3.76) | 24   | 1.07<br>(0.68, 1.68) |
|                                | 15-21 days     | 22   | 1.02<br>(0.64, 1.63) | 20   | 1.01<br>(0.62, 1.63) | 22  | 1.14<br>(0.64, 2.01) | 22   | 1.02<br>(0.64, 1.62) | 6   | 2.21<br>(0.84, 5.81) | 22   | 1.01<br>(0.63, 1.60) |
|                                | 22-28 days     | 27   | 1.46<br>(0.96, 2.22) | 25   | 1.46<br>(0.95, 2.25) | 27  | 1.61<br>(0.99, 2.64) | 27   | 1.46<br>(0.96, 2.21) | 5   | 2.35<br>(0.85, 6.46) | 27   | 1.45<br>(0.96, 2.20) |
| <b>Haemorrhagic stroke</b>     |                |      |                      |      |                      |     |                      |      |                      |     |                      |      |                      |
| <b>ChAdOx1nC oV-19 vaccine</b> | Baseline       | 1456 | 1.00                 | 1195 | 1.00                 | 668 | 1.00                 | 1424 | 1.00                 | 750 | 1.00                 | 1436 | 1.00                 |
|                                | -28 to -1 days | 232  | 0.47<br>(0.41, 0.55) | 224  | 0.57<br>(0.49, 0.67) |     |                      | 232  | 0.48<br>(0.41, 0.55) | 61  | 0.26<br>(0.20, 0.33) | 232  | 0.49<br>(0.42, 0.56) |
|                                | 0 day          | 7    | 0.37<br>(0.18, 0.78) | 6    | 0.41<br>(0.19, 0.93) | 7   | 0.22<br>(0.10, 0.47) | 7    | 0.37<br>(0.18, 0.78) | *   | 0.42<br>(0.16, 1.13) | 7    | 0.38<br>(0.18, 0.80) |
|                                | 1-7 days       | 131  | 0.98<br>(0.82, 1.18) | 94   | 0.93<br>(0.75, 1.15) | 131 | 0.61<br>(0.48, 0.78) | 130  | 0.98<br>(0.81, 1.18) | 91  | 1.35<br>(1.07, 1.69) | 131  | 1.01<br>(0.84, 1.21) |
|                                | 8-14 days      | 141  | 1.06<br>(0.89, 1.27) | 93   | 0.93<br>(0.75, 1.16) | 141 | 0.72<br>(0.57, 0.90) | 139  | 1.06<br>(0.88, 1.27) | 104 | 1.53<br>(1.24, 1.90) | 141  | 1.08<br>(0.91, 1.30) |
|                                | 15-21 days     | 128  | 0.98<br>(0.81, 1.18) | 92   | 0.95<br>(0.77, 1.19) | 128 | 0.72<br>(0.58, 0.89) | 127  | 0.98<br>(0.81, 1.18) | 85  | 1.25<br>(0.99, 1.58) | 128  | 0.99<br>(0.82, 1.19) |
|                                | 22-28 days     | 126  | 1.00<br>(0.83, 1.21) | 86   | 0.95<br>(0.76, 1.19) | 126 | 0.79<br>(0.64, 0.97) | 125  | 1.00<br>(0.83, 1.21) | 62  | 0.94<br>(0.72, 1.23) | 126  | 1.01<br>(0.83, 1.21) |
| <b>BNT162b2 mRNA vaccine</b>   | Baseline       | 811  | 1.00                 | 574  | 1.00                 | 622 | 1.00                 | 806  | 1.00                 | 416 | 1.00                 | 800  | 1.00                 |
|                                | -28 to -1 days | 86   | 0.36<br>(0.29, 0.46) | 83   | 0.43<br>(0.34, 0.55) |     |                      | 84   | 0.35<br>(0.28, 0.44) | 13  | 0.18<br>(0.10, 0.32) | 86   | 0.34<br>(0.27, 0.43) |
|                                | 0 day          | 6    | 0.59<br>(0.27, 1.33) | *    | 0.39<br>(0.12, 1.21) | 6   | 0.26<br>(0.11, 0.60) | 6    | 0.59<br>(0.26, 1.31) | *   | 0.87<br>(0.28, 2.73) | 6    | 0.56<br>(0.25, 1.26) |
|                                | 1-7 days       | 93   | 1.27<br>(1.02, 1.59) | 63   | 1.14<br>(0.87, 1.50) | 93  | 0.60<br>(0.44, 0.82) | 93   | 1.25<br>(1.00, 1.57) | 51  | 1.94<br>(1.42, 2.66) | 93   | 1.21<br>(0.96, 1.51) |
|                                | 8-14 days      | 89   | 1.18<br>(0.94, 1.48) | 59   | 1.06<br>(0.80, 1.40) | 89  | 0.64<br>(0.48, 0.86) | 89   | 1.16<br>(0.92, 1.46) | 52  | 1.85<br>(1.36, 2.51) | 89   | 1.12<br>(0.89, 1.40) |

|                                        |                   |      |                      |      |                      |     |                      |      |                      |     |                      |      |                      |
|----------------------------------------|-------------------|------|----------------------|------|----------------------|-----|----------------------|------|----------------------|-----|----------------------|------|----------------------|
|                                        | 15-21 days        | 106  | 1.38<br>(1.12, 1.71) | 69   | 1.24<br>(0.96, 1.61) | 106 | 0.86<br>(0.67, 1.11) | 106  | 1.37<br>(1.11, 1.69) | 64  | 2.13<br>(1.61, 2.81) | 106  | 1.31<br>(1.06, 1.62) |
|                                        | 22-28 days        | 91   | 1.15<br>(0.92, 1.44) | 59   | 1.06<br>(0.81, 1.40) | 91  | 0.80<br>(0.62, 1.02) | 91   | 1.14<br>(0.91, 1.42) | 60  | 1.79<br>(1.35, 2.38) | 91   | 1.09<br>(0.87, 1.36) |
| <b>Subarachnoid haemorrhage</b>        |                   |      |                      |      |                      |     |                      |      |                      |     |                      |      |                      |
| <b>ChAdOx1nC<br/>oV-19<br/>vaccine</b> | Baseline          | 971  | 1.00                 | 866  | 1.00                 | 343 | 1.00                 | 954  | 1.00                 | 460 | 1.00                 | 966  | 1.00                 |
|                                        | -28 to -1<br>days | 157  | 0.49<br>(0.41, 0.58) | 155  | 0.55<br>(0.46, 0.65) |     |                      | 157  | 0.49<br>(0.41, 0.58) | 37  | 0.22<br>(0.16, 0.31) | 157  | 0.49<br>(0.41, 0.58) |
|                                        | 0 day             | *    | 0.34<br>(0.13, 0.91) | *    | 0.20<br>(0.05, 0.80) | *   | 0.26<br>(0.09, 0.71) | *    | 0.34<br>(0.13, 0.91) | *   | 0.66<br>(0.24, 1.76) | *    | 0.34<br>(0.13, 0.92) |
|                                        | 1-7 days          | 70   | 0.85<br>(0.66, 1.10) | 56   | 0.81<br>(0.61, 1.07) | 70  | 0.65<br>(0.46, 0.92) | 70   | 0.86<br>(0.67, 1.10) | 44  | 1.06<br>(0.77, 1.47) | 70   | 0.86<br>(0.67, 1.10) |
|                                        | 8-14 days         | 93   | 1.16<br>(0.93, 1.44) | 76   | 1.14<br>(0.89, 1.45) | 93  | 0.93<br>(0.69, 1.26) | 91   | 1.14<br>(0.91, 1.42) | 63  | 1.61<br>(1.22, 2.13) | 93   | 1.16<br>(0.93, 1.45) |
|                                        | 15-21 days        | 72   | 0.92<br>(0.72, 1.18) | 52   | 0.82<br>(0.61, 1.09) | 72  | 0.77<br>(0.57, 1.04) | 72   | 0.92<br>(0.72, 1.19) | 54  | 1.44<br>(1.07, 1.94) | 72   | 0.92<br>(0.72, 1.18) |
|                                        | 22-28 days        | 69   | 0.94<br>(0.73, 1.20) | 49   | 0.82<br>(0.61, 1.10) | 69  | 0.82<br>(0.62, 1.09) | 69   | 0.94<br>(0.73, 1.21) | 44  | 1.26<br>(0.91, 1.74) | 69   | 0.93<br>(0.72, 1.19) |
| <b>BNT162b2<br/>mRNA<br/>vaccine</b>   | Baseline          | 415  | 1.00                 | 355  | 1.00                 | 240 | 1.00                 | 409  | 1.00                 | 191 | 1.00                 | 405  | 1.00                 |
|                                        | -28 to -1<br>days | 53   | 0.43<br>(0.32, 0.58) | 53   | 0.47<br>(0.35, 0.64) |     |                      | 53   | 0.44<br>(0.32, 0.59) | *   | 0.10<br>(0.03, 0.30) | 53   | 0.42<br>(0.31, 0.56) |
|                                        | 0 day             | 0    | n/a                  | 0    | n/a                  | 0   | n/a                  | 0    | n/a                  | 0   | n/a                  | 0    | n/a                  |
|                                        | 1-7 days          | 38   | 1.08<br>(0.77, 1.52) | 25   | 0.81<br>(0.53, 1.22) | 38  | 0.85<br>(0.53, 1.37) | 38   | 1.09<br>(0.77, 1.54) | 21  | 2.17<br>(1.35, 3.50) | 38   | 1.05<br>(0.75, 1.48) |
|                                        | 8-14 days         | 41   | 1.14<br>(0.82, 1.59) | 37   | 1.20<br>(0.84, 1.70) | 41  | 0.93<br>(0.61, 1.42) | 41   | 1.15<br>(0.82, 1.60) | 15  | 1.43<br>(0.83, 2.47) | 41   | 1.11<br>(0.80, 1.55) |
|                                        | 15-21 days        | 31   | 0.85<br>(0.58, 1.23) | 24   | 0.77<br>(0.50, 1.17) | 31  | 0.74<br>(0.48, 1.14) | 31   | 0.85<br>(0.59, 1.24) | 14  | 1.28<br>(0.73, 2.25) | 31   | 0.83<br>(0.57, 1.20) |
|                                        | 22-28 days        | 41   | 1.16<br>(0.84, 1.61) | 32   | 1.08<br>(0.75, 1.56) | 41  | 1.02<br>(0.71, 1.47) | 41   | 1.17<br>(0.84, 1.62) | 21  | 1.82<br>(1.14, 2.91) | 41   | 1.14<br>(0.82, 1.58) |
| <b>Celiac</b>                          |                   |      |                      |      |                      |     |                      |      |                      |     |                      |      |                      |
| <b>ChAdOx1nC<br/>oV-19<br/>vaccine</b> | Baseline          | 2403 | 1.00                 | 2400 | 1.00                 | 775 | 1.00                 | 2368 | 1.00                 | 594 | 1.00                 | 2399 | 1.00                 |
|                                        | -28 to -1<br>days | 715  | 0.95<br>(0.87, 1.04) | 715  | 0.95<br>(0.87, 1.04) |     |                      | 715  | 0.95<br>(0.87, 1.04) | 174 | 0.79<br>(0.65, 0.96) | 715  | 0.95<br>(0.86, 1.04) |

|                                |                |      |                       |      |                       |     |                       |      |                       |     |                         |      |                       |
|--------------------------------|----------------|------|-----------------------|------|-----------------------|-----|-----------------------|------|-----------------------|-----|-------------------------|------|-----------------------|
|                                | 0 day          | *    | 0.07<br>(0.02, 0.29)  | *    | 0.07<br>(0.02, 0.29)  | *   | 0.10<br>(0.02, 0.39)  | *    | 0.07<br>(0.02, 0.29)  | 0   | n/a                     | *    | 0.07<br>(0.02, 0.29)  |
|                                | 1-7 days       | 164  | 0.84<br>(0.72, 0.99)  | 164  | 0.84<br>(0.72, 0.99)  | 164 | 1.11<br>(0.88, 1.40)  | 164  | 0.85<br>(0.72, 1.00)  | 38  | 0.74<br>(0.52, 1.06)    | 164  | 0.84<br>(0.71, 0.99)  |
|                                | 8-14 days      | 196  | 1.01<br>(0.87, 1.17)  | 196  | 1.01<br>(0.87, 1.18)  | 196 | 1.28<br>(1.04, 1.58)  | 196  | 1.02<br>(0.87, 1.18)  | 38  | 0.79<br>(0.56, 1.12)    | 196  | 1.01<br>(0.87, 1.17)  |
|                                | 15-21 days     | 184  | 0.97<br>(0.83, 1.13)  | 184  | 0.97<br>(0.83, 1.13)  | 184 | 1.19<br>(0.98, 1.45)  | 184  | 0.97<br>(0.83, 1.14)  | 36  | 0.79<br>(0.55, 1.14)    | 184  | 0.97<br>(0.83, 1.13)  |
|                                | 22-28 days     | 183  | 0.99<br>(0.85, 1.16)  | 183  | 0.99<br>(0.85, 1.16)  | 183 | 1.19<br>(0.99, 1.43)  | 183  | 1.00<br>(0.85, 1.16)  | 38  | 0.94<br>(0.66, 1.33)    | 183  | 0.99<br>(0.85, 1.15)  |
| <b>BNT162b2 mRNA vaccine</b>   | Baseline       | 1610 | 1.00                  | 1606 | 1.00                  | 755 | 1.00                  | 1597 | 1.00                  | 279 | 1.00                    | 1595 | 1.00                  |
|                                | -28 to -1 days | 437  | 0.88<br>(0.79, 0.98)  | 437  | 0.88<br>(0.79, 0.99)  |     |                       | 437  | 0.88<br>(0.79, 0.99)  | 29  | 0.82<br>(0.55, 1.22)    | 437  | 0.88<br>(0.79, 0.98)  |
|                                | 0 day          | 5    | 0.27<br>(0.11, 0.65)  | 5    | 0.27<br>(0.11, 0.65)  | 5   | 0.38<br>(0.15, 0.93)  | 5    | 0.27<br>(0.11, 0.65)  | *   | 1.00<br>(0.14, 7.19)    | 5    | 0.27<br>(0.11, 0.65)  |
|                                | 1-7 days       | 98   | 0.75<br>(0.61, 0.92)  | 98   | 0.75<br>(0.61, 0.93)  | 98  | 1.01<br>(0.76, 1.34)  | 97   | 0.75<br>(0.60, 0.92)  | 12  | 1.77<br>(0.97, 3.24)    | 98   | 0.75<br>(0.61, 0.92)  |
|                                | 8-14 days      | 121  | 0.90<br>(0.75, 1.09)  | 121  | 0.91<br>(0.75, 1.10)  | 121 | 1.14<br>(0.89, 1.46)  | 121  | 0.91<br>(0.75, 1.10)  | 15  | 2.17<br>(1.25, 3.76)    | 121  | 0.90<br>(0.75, 1.09)  |
|                                | 15-21 days     | 122  | 0.89<br>(0.73, 1.07)  | 119  | 0.87<br>(0.72, 1.05)  | 122 | 1.11<br>(0.88, 1.40)  | 122  | 0.89<br>(0.74, 1.08)  | 14  | 2.04<br>(1.15, 3.61)    | 122  | 0.89<br>(0.73, 1.07)  |
|                                | 22-28 days     | 116  | 0.86<br>(0.71, 1.05)  | 116  | 0.87<br>(0.71, 1.05)  | 116 | 1.02<br>(0.82, 1.27)  | 116  | 0.86<br>(0.71, 1.05)  | 7   | 1.05<br>(0.48, 2.28)    | 116  | 0.86<br>(0.71, 1.04)  |
| <b>Anaphylaxis</b>             |                |      |                       |      |                       |     |                       |      |                       |     |                         |      |                       |
| <b>ChAdOx1nC oV-19 vaccine</b> | Baseline       | 438  | 1.00                  | 438  | 1.00                  | 160 | 1.00                  | 422  | 1.00                  | 164 | 1.00                    | 433  | 1.00                  |
|                                | -28 to -1 days | 111  | 0.82<br>(0.66, 1.02)  | 111  | 0.82<br>(0.66, 1.02)  |     |                       | 111  | 0.83<br>(0.66, 1.03)  | 39  | 0.81<br>(0.55, 1.18)    | 111  | 0.82<br>(0.66, 1.02)  |
|                                | 0 day          | 47   | 9.68<br>(7.08, 13.24) | 47   | 9.72<br>(7.10, 13.29) | 47  | 8.33<br>(4.93, 14.08) | 46   | 9.64<br>(7.02, 13.24) | 41  | 29.79<br>(20.33, 43.63) | 47   | 9.71<br>(7.10, 13.28) |
|                                | 1-7 days       | 52   | 1.55<br>(1.15, 2.09)  | 52   | 1.55<br>(1.15, 2.10)  | 52  | 1.36<br>(0.83, 2.22)  | 52   | 1.57<br>(1.16, 2.12)  | 27  | 2.97<br>(1.91, 4.63)    | 52   | 1.55<br>(1.15, 2.10)  |
|                                | 8-14 days      | 25   | 0.74<br>(0.49, 1.11)  | 25   | 0.74<br>(0.49, 1.11)  | 25  | 0.64<br>(0.37, 1.08)  | 25   | 0.75<br>(0.50, 1.13)  | 8   | 0.88<br>(0.42, 1.84)    | 25   | 0.74<br>(0.49, 1.11)  |
|                                | 15-21 days     | 36   | 1.05                  | 36   | 1.05                  | 36  | 0.94                  | 36   | 1.07                  | 12  | 1.34                    | 36   | 1.05                  |



|                              |                |     |                         |     |                         |    |                        |     |                         |    |                          |     |                         |
|------------------------------|----------------|-----|-------------------------|-----|-------------------------|----|------------------------|-----|-------------------------|----|--------------------------|-----|-------------------------|
|                              |                |     | (0.74, 1.49)            |     | (0.74, 1.49)            |    | (0.60, 1.46)           |     | (0.75, 1.52)            |    | (0.72, 2.49)             |     | (0.74, 1.49)            |
|                              | 22-28 days     | 26  | 0.78<br>(0.52, 1.18)    | 26  | 0.79<br>(0.52, 1.18)    | 26 | 0.73<br>(0.46, 1.16)   | 26  | 0.80<br>(0.53, 1.20)    | *  | 0.50<br>(0.18, 1.37)     | 26  | 0.78<br>(0.52, 1.17)    |
| <b>BNT162b2 mRNA vaccine</b> | Baseline       | 167 | 1.00                    | 165 | 1.00                    | 76 | 1.00                   | 162 | 1.00                    | 64 | 1.00                     | 165 | 1.00                    |
|                              | -28 to -1 days | 31  | 0.73<br>(0.49, 1.08)    | 31  | 0.74<br>(0.50, 1.10)    |    |                        | 31  | 0.77<br>(0.51, 1.14)    | 8  | 0.79<br>(0.37, 1.69)     | 31  | 0.71<br>(0.48, 1.06)    |
|                              | 0 day          | 29  | 19.31<br>(12.77, 29.19) | 29  | 19.65<br>(12.99, 29.72) | 29 | 14.81<br>(7.51, 29.21) | 29  | 19.92<br>(13.13, 30.22) | 23 | 83.74<br>(47.35, 148.08) | 29  | 18.78<br>(12.42, 28.39) |
|                              | 1-7 days       | 16  | 1.50<br>(0.89, 2.55)    | 16  | 1.53<br>(0.90, 2.60)    | 16 | 1.22<br>(0.59, 2.50)   | 16  | 1.54<br>(0.91, 2.62)    | 9  | 4.54<br>(2.11, 9.77)     | 16  | 1.46<br>(0.86, 2.48)    |
|                              | 8-14 days      | 22  | 1.99<br>(1.25, 3.17)    | 22  | 2.03<br>(1.28, 3.23)    | 22 | 1.63<br>(0.87, 3.04)   | 21  | 1.94<br>(1.21, 3.12)    | 5  | 2.38<br>(0.90, 6.31)     | 22  | 1.94<br>(1.22, 3.08)    |
|                              | 15-21 days     | 12  | 1.10<br>(0.60, 2.00)    | 12  | 1.12<br>(0.61, 2.04)    | 12 | 1.01<br>(0.51, 2.01)   | 12  | 1.12<br>(0.61, 2.04)    | *  | 2.12<br>(0.73, 6.13)     | 12  | 1.07<br>(0.59, 1.95)    |
|                              | 22-28 days     | 11  | 0.99<br>(0.53, 1.84)    | 11  | 1.00<br>(0.54, 1.87)    | 11 | 0.94<br>(0.48, 1.87)   | 10  | 0.92<br>(0.48, 1.76)    | *  | 1.02<br>(0.24, 4.35)     | 11  | 0.96<br>(0.51, 1.79)    |

\*Sensitivity 1: excluding those who died from the outcome; Sensitivity 2: restricting analysis to the period post-vaccination, without censoring at death, Sensitivity 3: restricting the study period until the 1 May 2021, Sensitivity 4: restricting analysis to patients who received only one vaccine dose and Sensitivity 5: censoring at 12 weeks post vaccination.

° Sensitivity model 2 does not converge.

**Supplementary table 7b: Incidence rate ratios (IRR 95% CI) for single outcomes in pre-defined risk periods 28 days immediately before and 35 days after exposure to vaccination and to a positive SARS-CoV-2 test, adjusted for calendar time from 1 December 2020 to 31 May 2021.**

|                                   | Time period    | ChAdOx1nCoV-19 vaccine |                   | BNT162b2 mRNA vaccine |                   | Positive SARS-CoV-2 test |                     |
|-----------------------------------|----------------|------------------------|-------------------|-----------------------|-------------------|--------------------------|---------------------|
|                                   |                | events                 | IRR (95% CI)      | events                | IRR (95% CI)      | events                   | IRR (95% CI)        |
| <b>CNS Demyelinating disorder</b> | Baseline       | 440                    | 1.00              | 230                   | 1.00              | 52                       | 1.00                |
|                                   | -28 to -1 days | 117                    | 0.82 (0.66, 1.02) | 58                    | 0.90 (0.66, 1.22) | 27                       | 3.04 (1.83, 5.04)   |
|                                   | 0 day          | 0                      | n/a               | *                     | 0.42 (0.06, 2.99) | 7                        | 19.97 (8.86, 45.01) |
|                                   | 1-7 days       | 38                     | 1.02 (0.72, 1.44) | 15                    | 0.89 (0.52, 1.52) | 9                        | 3.56 (1.71, 7.40)   |



|                                 |                |      |                   |     |                   |     |                       |
|---------------------------------|----------------|------|-------------------|-----|-------------------|-----|-----------------------|
|                                 | 15-21 days     | 136  | 1.31 (1.09, 1.58) | 65  | 1.04 (0.80, 1.36) | 9   | 1.09 (0.55, 2.15)     |
|                                 | 22-28 days     | 115  | 1.14 (0.94, 1.39) | 71  | 1.16 (0.90, 1.49) | 7   | 0.80 (0.37, 1.72)     |
|                                 | 29-35 days     | 108  | 1.13 (0.92, 1.38) | 57  | 0.92 (0.70, 1.22) | 9   | 0.96 (0.49, 1.89)     |
|                                 |                |      |                   |     |                   |     |                       |
| <b>Myasthenic disorder</b>      | Baseline       | 292  | 1.00              | 199 | 1.00              | 30  | 1.00                  |
|                                 | -28 to -1 days | 70   | 0.70 (0.52, 0.93) | 44  | 0.57 (0.40, 0.81) | 26  | 4.13 (2.34, 7.27)     |
|                                 | 0 day          | 0    | n/a               | *   | 0.94 (0.30, 2.96) | 18  | 62.69 (33.79, 116.30) |
|                                 | 1-7 days       | 17   | 0.67 (0.40, 1.12) | 18  | 0.80 (0.48, 1.34) | 29  | 14.05 (8.14, 24.25)   |
|                                 | 8-14 days      | 26   | 1.12 (0.73, 1.72) | 24  | 1.06 (0.67, 1.66) | 9   | 4.09 (1.90, 8.82)     |
|                                 | 15-21 days     | 33   | 1.51 (1.03, 2.23) | 22  | 0.99 (0.62, 1.57) | 5   | 2.23 (0.85, 5.83)     |
|                                 | 22-28 days     | 23   | 0.97 (0.62, 1.52) | 27  | 1.40 (0.92, 2.14) | 6   | 2.89 (1.19, 7.05)     |
|                                 | 29-35 days     | 19   | 0.81 (0.50, 1.30) | 14  | 0.73 (0.42, 1.27) | *   | 1.47 (0.45, 4.86)     |
|                                 |                |      |                   |     |                   |     |                       |
| <b>Haemorrhagic stroke</b>      | Baseline       | 1325 | 1.00              | 724 | 1.00              | 165 | 1.00                  |
|                                 | -28 to -1 days | 232  | 0.48 (0.42, 0.56) | 86  | 0.36 (0.29, 0.46) | 163 | 4.79 (3.74, 6.12)     |
|                                 | 0 day          | 7    | 0.38 (0.18, 0.80) | 6   | 0.60 (0.27, 1.35) | 20  | 12.58 (7.81, 20.26)   |
|                                 | 1-7 days       | 131  | 1.00 (0.83, 1.21) | 93  | 1.29 (1.03, 1.62) | 23  | 2.04 (1.30, 3.20)     |
|                                 | 8-14 days      | 141  | 1.09 (0.91, 1.31) | 89  | 1.19 (0.95, 1.50) | 14  | 1.21 (0.69, 2.10)     |
|                                 | 15-21 days     | 128  | 1.00 (0.83, 1.21) | 106 | 1.41 (1.14, 1.74) | 10  | 0.86 (0.45, 1.63)     |
|                                 | 22-28 days     | 126  | 1.03 (0.85, 1.24) | 91  | 1.17 (0.94, 1.47) | 6   | 0.52 (0.23, 1.17)     |
|                                 | 29-35 days     | 131  | 1.14 (0.95, 1.38) | 87  | 1.11 (0.88, 1.39) | 13  | 1.10 (0.62, 1.95)     |
|                                 |                |      |                   |     |                   |     |                       |
| <b>Subarachnoid haemorrhage</b> | Baseline       | 910  | 1.00              | 385 | 1.00              | 93  | 1.00                  |
|                                 | -28 to -1 days | 157  | 0.48 (0.40, 0.57) | 53  | 0.43 (0.32, 0.57) | 60  | 3.22 (2.24, 4.61)     |
|                                 | 0 day          | *    | 0.33 (0.13, 0.90) | 0   | n/a               | 19  | 22.90 (13.69, 38.31)  |
|                                 | 1-7 days       | 70   | 0.84 (0.65, 1.08) | 38  | 1.06 (0.75, 1.49) | 23  | 3.93 (2.44, 6.35)     |
|                                 | 8-14 days      | 93   | 1.13 (0.90, 1.41) | 41  | 1.11 (0.80, 1.55) | 12  | 2.03 (1.10, 3.77)     |
|                                 | 15-21 days     | 72   | 0.90 (0.70, 1.16) | 31  | 0.83 (0.57, 1.20) | 7   | 1.16 (0.53, 2.53)     |
|                                 | 22-28 days     | 69   | 0.91 (0.71, 1.18) | 41  | 1.13 (0.81, 1.57) | 7   | 1.13 (0.52, 2.45)     |

|  |            |    |                   |    |                   |   |                   |
|--|------------|----|-------------------|----|-------------------|---|-------------------|
|  | 29-35 days | 61 | 0.87 (0.67, 1.14) | 30 | 0.83 (0.57, 1.21) | * | 0.31 (0.08, 1.25) |
|--|------------|----|-------------------|----|-------------------|---|-------------------|

**Supplementary table 7c: Incidence rate ratios (IRR 95% CI) for individual outcomes in pre-defined risk periods immediately before and after exposure to a positive SARS-CoV-2 test result, adjusted for calendar time from 1 December 2020 until 31 May 2021, 2021 (cells with < 5 are suppressed): comparisons between patients infected before vaccination and all patients (infected before and after vaccination)**

|                                             | Time period    | Positive SARS-CoV-2 test (before vaccination) |                      | Positive SARS-CoV-2 test before or after vaccination) |                      |
|---------------------------------------------|----------------|-----------------------------------------------|----------------------|-------------------------------------------------------|----------------------|
|                                             |                | events                                        | IRR (95% CI)         | events                                                | IRR (95% CI)         |
| <b>Acute CNS Demyelinating disorder</b>     | Baseline       | 52                                            | 1.00                 | 53                                                    | 1.00                 |
|                                             | -28 to -1 days | 21                                            | 2.35 (1.37, 4.03)    | 27                                                    | 2.94 (1.79, 4.83)    |
|                                             | 0 day          | 6                                             | 17.12 (7.22, 40.62)  | 7                                                     | 19.34 (8.63, 43.38)  |
|                                             | 1-7 days       | 7                                             | 2.78 (1.24, 6.22)    | 9                                                     | 3.45 (1.67, 7.14)    |
|                                             | 8-14 days      | 7                                             | 2.70 (1.21, 6.04)    | 7                                                     | 2.61 (1.17, 5.84)    |
|                                             | 15-21 days     | 6                                             | 2.12 (0.90, 4.97)    | 6                                                     | 2.05 (0.87, 4.82)    |
|                                             | 22-28 days     | *                                             | 0.62 (0.15, 2.54)    | *                                                     | 0.60 (0.15, 2.47)    |
| <b>Encephalitis meningitis and myelitis</b> | Baseline       | 55                                            | 1.00                 | 66                                                    | 1.00                 |
|                                             | -28 to -1 days | 63                                            | 6.14 (4.07, 9.26)    | 78                                                    | 5.64 (3.91, 8.13)    |
|                                             | 0 day          | 16                                            | 36.22 (20.15, 65.09) | 23                                                    | 38.57 (23.41, 63.56) |
|                                             | 1-7 days       | 18                                            | 5.79 (3.31, 10.14)   | 24                                                    | 5.71 (3.49, 9.32)    |
|                                             | 8-14 days      | 22                                            | 6.81 (4.05, 11.44)   | 24                                                    | 5.63 (3.46, 9.15)    |

|                                |                |     |                      |     |                      |
|--------------------------------|----------------|-----|----------------------|-----|----------------------|
|                                | 15-21 days     | 6   | 1.81 (0.77, 4.26)    | 6   | 1.38 (0.59, 3.21)    |
|                                | 22-28 days     | 5   | 1.43 (0.57, 3.58)    | 6   | 1.33 (0.57, 3.08)    |
|                                |                |     |                      |     |                      |
| <b>Guillain-Barre syndrome</b> | Baseline       | 28  | 1.00                 | 30  | 1.00                 |
|                                | -28 to -1 days | 20  | 5.14 (2.74, 9.67)    | 23  | 4.85 (2.67, 8.82)    |
|                                | 0 day          | 5   | 28.47 (10.67, 75.96) | 7   | 33.37 (14.21, 78.36) |
|                                | 1-7 days       | 8   | 6.39 (2.82, 14.47)   | 11  | 7.36 (3.57, 15.18)   |
|                                | 8-14 days      | 8   | 6.25 (2.76, 14.13)   | 8   | 5.19 (2.31, 11.65)   |
|                                | 15-21 days     | 10  | 7.30 (3.45, 15.42)   | 11  | 6.89 (3.37, 14.09)   |
|                                | 22-28 days     | 6   | 4.02 (1.64, 9.86)    | 6   | 3.51 (1.44, 8.57)    |
|                                |                |     |                      |     |                      |
| <b>Bell's palsy</b>            | Baseline       | 120 | 1.00                 | 134 | 1.00                 |
|                                | -28 to -1 days | 65  | 3.09 (2.22, 4.29)    | 86  | 3.34 (2.49, 4.48)    |
|                                | 0 day          | 27  | 31.04 (20.09, 47.94) | 35  | 33.23 (22.57, 48.94) |
|                                | 1-7 days       | 35  | 5.66 (3.82, 8.40)    | 44  | 5.84 (4.09, 8.33)    |
|                                | 8-14 days      | 15  | 2.36 (1.37, 4.08)    | 17  | 2.17 (1.30, 3.63)    |
|                                | 15-21 days     | 8   | 1.18 (0.57, 2.42)    | 9   | 1.09 (0.55, 2.15)    |
|                                | 22-28 days     | 5   | 0.68 (0.28, 1.67)    | 7   | 0.80 (0.37, 1.72)    |
|                                |                |     |                      |     |                      |
|                                | Baseline       | 28  | 1.00                 | 32  | 1.00                 |

|                                 |                |     |                       |     |                       |
|---------------------------------|----------------|-----|-----------------------|-----|-----------------------|
| <b>Myasthenic disorder</b>      | -28 to -1 days | 19  | 3.59 (1.92, 6.73)     | 26  | 4.00 (2.30, 6.96)     |
|                                 | 0 day          | 13  | 54.96 (27.50, 109.82) | 18  | 61.32 (33.43, 112.50) |
|                                 | 1-7 days       | 22  | 13.22 (7.30, 23.97)   | 29  | 13.74 (8.07, 23.41)   |
|                                 | 8-14 days      | 8   | 4.51 (2.01, 10.14)    | 9   | 3.98 (1.86, 8.52)     |
|                                 | 15-21 days     | *   | 1.65 (0.49, 5.48)     | 5   | 2.17 (0.84, 5.63)     |
|                                 | 22-28 days     | 5   | 2.92 (1.11, 7.64)     | 6   | 2.81 (1.16, 6.79)     |
|                                 |                |     |                       |     |                       |
| <b>Haemorrhagic stroke</b>      | Baseline       | 149 | 1.00                  | 173 | 1.00                  |
|                                 | -28 to -1 days | 125 | 4.75 (3.62, 6.24)     | 163 | 4.73 (3.72, 6.02)     |
|                                 | 0 day          | 13  | 10.90 (6.11, 19.46)   | 20  | 12.42 (7.73, 19.95)   |
|                                 | 1-7 days       | 14  | 1.64 (0.94, 2.87)     | 23  | 2.01 (1.29, 3.15)     |
|                                 | 8-14 days      | 6   | 0.67 (0.30, 1.54)     | 14  | 1.19 (0.69, 2.07)     |
|                                 | 15-21 days     | 6   | 0.66 (0.29, 1.51)     | 10  | 0.84 (0.44, 1.61)     |
|                                 | 22-28 days     | 5   | 0.55 (0.23, 1.36)     | 6   | 0.51 (0.23, 1.16)     |
|                                 |                |     |                       |     |                       |
| <b>Subarachnoid haemorrhage</b> | Baseline       | 75  | 1.00                  | 88  | 1.00                  |
|                                 | -28 to -1 days | 51  | 3.64 (2.46, 5.39)     | 60  | 3.40 (2.38, 4.86)     |
|                                 | 0 day          | 12  | 19.89 (10.61, 37.28)  | 19  | 24.22 (14.50, 40.45)  |

|            |    |                   |    |                   |
|------------|----|-------------------|----|-------------------|
| 1-7 days   | 16 | 3.81 (2.18, 6.67) | 23 | 4.17 (2.59, 6.71) |
| 8-14 days  | 8  | 1.88 (0.90, 3.95) | 12 | 2.15 (1.16, 3.99) |
| 15-21 days | 6  | 1.38 (0.60, 3.20) | 7  | 1.23 (0.57, 2.67) |
| 22-28 days | 6  | 1.32 (0.57, 3.05) | 7  | 1.19 (0.55, 2.58) |

**Supplementary table 7d: Incidence rate ratios (IRR 95% CI) for single outcomes in pre-defined risk periods 28 days immediately before and 28 days after exposure to vaccination and to a positive SARS-CoV-2 test, adjusted for calendar time from 1 December 2020 to 31 May 2021 restricted to patients who did not have a SARS-CoV-2 positive test.**

|                                         | Time period    | ChAdOx1nCoV-19 vaccine |                   | BNT162b2 mRNA vaccine |                   |
|-----------------------------------------|----------------|------------------------|-------------------|-----------------------|-------------------|
|                                         |                | events                 | IRR (95% CI)      | events                | IRR (95% CI)      |
| <b>CNS Demyelinating disorder</b>       | Baseline       | 406                    | 1.00              | 221                   | 1.00              |
|                                         | -28 to -1 days | 108                    | 0.88 (0.70, 1.11) | 53                    | 0.92 (0.67, 1.25) |
|                                         | 0 day          | 0                      | n/a               | *                     | 0.48 (0.07, 3.44) |
|                                         | 1-7 days       | 36                     | 1.10 (0.77, 1.56) | 12                    | 0.83 (0.46, 1.49) |
|                                         | 8-14 days      | 31                     | 0.96 (0.66, 1.40) | 12                    | 0.80 (0.44, 1.45) |
|                                         | 15-21 days     | 31                     | 0.96 (0.66, 1.41) | 15                    | 0.97 (0.57, 1.65) |
|                                         | 22-28 days     | 30                     | 0.96 (0.65, 1.40) | 18                    | 1.14 (0.69, 1.86) |
| <b>Encephalitis/meningitis/myelitis</b> | Baseline       | 455                    | 1.00              | 232                   | 1.00              |
|                                         | -28 to -1 days | 62                     | 0.39 (0.30, 0.52) | 37                    | 0.58 (0.40, 0.83) |
|                                         | 0 day          | *                      | 0.52 (0.17, 1.62) | 0                     | n/a               |
|                                         | 1-7 days       | 43                     | 1.08 (0.78, 1.50) | 19                    | 1.05 (0.65, 1.71) |
|                                         | 8-14 days      | 52                     | 1.33 (0.98, 1.79) | 21                    | 1.11 (0.70, 1.77) |
|                                         | 15-21 days     | 30                     | 0.79 (0.54, 1.16) | 20                    | 1.07 (0.67, 1.71) |
|                                         | 22-28 days     | 34                     | 0.95 (0.66, 1.36) | 22                    | 1.20 (0.76, 1.88) |
| <b>Guillain-Barre</b>                   | Baseline       | 201                    | 1.00              | 88                    | 1.00              |

|                            |                |      |                   |     |                   |
|----------------------------|----------------|------|-------------------|-----|-------------------|
|                            | -28 to -1 days | 33   | 0.46 (0.31, 0.68) | 20  | 0.86 (0.51, 1.43) |
|                            | 0 day          | 0    | n/a               | 0   | n/a               |
|                            | 1-7 days       | 12   | 0.59 (0.32, 1.07) | 8   | 1.15 (0.55, 2.43) |
|                            | 8-14 days      | 21   | 1.03 (0.64, 1.64) | 5   | 0.66 (0.26, 1.65) |
|                            | 15-21 days     | 63   | 3.06 (2.24, 4.18) | 8   | 1.00 (0.48, 2.11) |
|                            | 22-28 days     | 46   | 2.32 (1.64, 3.27) | 7   | 0.85 (0.39, 1.87) |
|                            |                |      |                   |     |                   |
| <b>Bell's palsy</b>        | Baseline       | 1156 | 1.00              | 646 | 1.00              |
|                            | -28 to -1 days | 295  | 0.81 (0.71, 0.93) | 157 | 0.81 (0.67, 0.97) |
|                            | 0 day          | 5    | 0.37 (0.15, 0.89) | *   | 0.40 (0.13, 1.26) |
|                            | 1-7 days       | 80   | 0.84 (0.67, 1.06) | 47  | 0.88 (0.65, 1.20) |
|                            | 8-14 days      | 73   | 0.77 (0.60, 0.98) | 51  | 0.94 (0.70, 1.27) |
|                            | 15-21 days     | 126  | 1.33 (1.10, 1.61) | 59  | 1.07 (0.81, 1.40) |
|                            | 22-28 days     | 99   | 1.06 (0.86, 1.31) | 61  | 1.11 (0.85, 1.45) |
|                            |                |      |                   |     |                   |
| <b>Myasthenic disorder</b> | Baseline       | 232  | 1.00              | 191 | 1.00              |
|                            | -28 to -1 days | 62   | 0.83 (0.61, 1.14) | 40  | 0.60 (0.42, 0.86) |
|                            | 0 day          | 0    | n/a               | *   | 1.08 (0.34, 3.41) |
|                            | 1-7 days       | 15   | 0.78 (0.45, 1.34) | 15  | 0.82 (0.48, 1.42) |
|                            | 8-14 days      | 24   | 1.32 (0.85, 2.06) | 20  | 1.09 (0.67, 1.77) |
|                            | 15-21 days     | 29   | 1.64 (1.09, 2.47) | 18  | 0.99 (0.60, 1.64) |
|                            | 22-28 days     | 20   | 1.04 (0.65, 1.67) | 25  | 1.54 (1.00, 2.38) |
|                            |                |      |                   |     |                   |
| <b>Haemorrhagic stroke</b> | Baseline       | 1169 | 1.00              | 746 | 1.00              |
|                            | -28 to -1 days | 214  | 0.51 (0.44, 0.59) | 81  | 0.38 (0.30, 0.49) |
|                            | 0 day          | 6    | 0.37 (0.16, 0.82) | 5   | 0.56 (0.23, 1.35) |
|                            | 1-7 days       | 112  | 0.97 (0.80, 1.19) | 82  | 1.27 (1.00, 1.61) |
|                            | 8-14 days      | 123  | 1.06 (0.88, 1.29) | 74  | 1.08 (0.84, 1.38) |



|                                 |                |     |                   |     |                   |
|---------------------------------|----------------|-----|-------------------|-----|-------------------|
|                                 | 15-21 days     | 114 | 0.98 (0.81, 1.20) | 96  | 1.36 (1.09, 1.70) |
|                                 | 22-28 days     | 116 | 1.03 (0.85, 1.26) | 82  | 1.12 (0.88, 1.41) |
|                                 |                |     |                   |     |                   |
| <b>Subarachnoid haemorrhage</b> | Baseline       | 833 | 1.00              | 374 | 1.00              |
|                                 | -28 to -1 days | 136 | 0.47 (0.39, 0.57) | 49  | 0.44 (0.32, 0.59) |
|                                 | 0 day          | *   | 0.19 (0.05, 0.76) | 0   | n/a               |
|                                 | 1-7 days       | 66  | 0.91 (0.70, 1.17) | 31  | 0.98 (0.68, 1.43) |
|                                 | 8-14 days      | 76  | 1.06 (0.83, 1.35) | 37  | 1.17 (0.82, 1.65) |
|                                 | 15-21 days     | 62  | 0.88 (0.67, 1.15) | 26  | 0.80 (0.53, 1.20) |
|                                 | 22-28 days     | 63  | 0.94 (0.72, 1.22) | 38  | 1.18 (0.84, 1.66) |

**Supplementary table 8: ICD-10 codes used to identify cases with each outcome.**

| Composite outcomes            | ICD-10 code and description                                                                                                                                                                                                                                                                                                                                                                                                                                                                                                                |
|-------------------------------|--------------------------------------------------------------------------------------------------------------------------------------------------------------------------------------------------------------------------------------------------------------------------------------------------------------------------------------------------------------------------------------------------------------------------------------------------------------------------------------------------------------------------------------------|
|                               |                                                                                                                                                                                                                                                                                                                                                                                                                                                                                                                                            |
| <b>Demyelinating disorder</b> | G361 Acute and subacute haemorrhagic leukoencephalitis [Hurst]<br>G368 Other specified acute disseminated demyelination<br>G369 Acute disseminated demyelination, unspecified<br>G372 Central pontine myelinolysis<br>G373 Acute transverse myelitis in demyelinating disease of central nervous system<br>G378 Other specified demyelinating diseases of central nervous system<br>G379 Demyelinating disease of central nervous system, unspecified<br>H46X Optic neuritis<br>H481 Retrobulbar neuritis in diseases classified elsewhere |
|                               |                                                                                                                                                                                                                                                                                                                                                                                                                                                                                                                                            |
|                               |                                                                                                                                                                                                                                                                                                                                                                                                                                                                                                                                            |
|                               | A87 - Viral meningitis                                                                                                                                                                                                                                                                                                                                                                                                                                                                                                                     |

|                                             |                                                                                            |
|---------------------------------------------|--------------------------------------------------------------------------------------------|
| <b>Encephalitis meningitis and myelitis</b> | A870 - Enteroviral meningitis                                                              |
|                                             | A871 - Adenoviral meningitis                                                               |
|                                             | A878 - Other viral meningitis                                                              |
|                                             | A879 - Viral meningitis, unspecified                                                       |
|                                             | G030 - Nonpyogenic meningitis                                                              |
|                                             | G039 - Meningitis, unspecified                                                             |
|                                             | G04 - Encephalitis, myelitis and encephalomyelitis                                         |
|                                             | G048 - Other encephalitis, myelitis and encephalomyelitis                                  |
|                                             | G049 - Encephalitis, myelitis and encephalomyelitis, unspecified                           |
|                                             | G05 – Encephalitis, myelitis, encephalomyelitis in diseases classified elsewhere           |
|                                             | G051 - Encephalitis, myelitis and encephalomyelitis in viral diseases classified elsewhere |
|                                             | G058 - Encephalitis, myelitis and encephalomyelitis in other diseases classified elsewhere |
|                                             |                                                                                            |
| <b>Guillain-Barre</b>                       | G610 - Guillain-Barré syndrome                                                             |
|                                             |                                                                                            |
| <b>Bell's palsy</b>                         | G510 - Bell palsy                                                                          |
|                                             |                                                                                            |
| <b>Myasthenic disorder</b>                  | G70 - Myasthenia gravis and other myoneural disorders                                      |
|                                             | G700 - Myasthenia gravis                                                                   |
|                                             | G709 - Myoneural disorder, unspecified                                                     |
|                                             | G733 - Myasthenic syndromes in other diseases classified elsewhere                         |
|                                             |                                                                                            |
| <b>Haemorrhagic stroke</b>                  | I61 - Intracerebral haemorrhage                                                            |

|                                 |                                                                       |
|---------------------------------|-----------------------------------------------------------------------|
|                                 | I610 - Intracerebral haemorrhage in hemisphere, subcortical           |
|                                 | I611, I611 - Intracerebral haemorrhage in hemisphere, cortical        |
|                                 | I612, I612 - Intracerebral haemorrhage in hemisphere, unspecified     |
|                                 | I613, I613 - Intracerebral haemorrhage in brain stem                  |
|                                 | I614, I614 - Intracerebral haemorrhage in cerebellum                  |
|                                 | I615, I615 - Intracerebral haemorrhage, intraventricular              |
|                                 | I616, I616 - Intracerebral haemorrhage, multiple localized            |
|                                 | I618, I618 - Other intracerebral haemorrhage                          |
|                                 | I619, I619 - Intracerebral haemorrhage, unspecified                   |
|                                 |                                                                       |
| <b>Subarachnoid haemorrhage</b> | I60 - Subarachnoid haemorrhage                                        |
|                                 | I600 - Subarachnoid haemorrhage from carotid siphon and bifurcation   |
|                                 | I601 - Subarachnoid haemorrhage from middle cerebral artery           |
|                                 | I602 - Subarachnoid haemorrhage from anterior communicating artery    |
|                                 | I603 - Subarachnoid haemorrhage from posterior communicating artery   |
|                                 | I604 - Subarachnoid haemorrhage from basilar artery                   |
|                                 | I605 - Subarachnoid haemorrhage from vertebral artery                 |
|                                 | I606 - Subarachnoid haemorrhage from other intracranial arteries      |
|                                 | I607 - Subarachnoid haemorrhage from intracranial artery, unspecified |
|                                 | I608 - Other subarachnoid haemorrhage                                 |
|                                 | I609 - Subarachnoid haemorrhage, unspecified                          |

|  |                                             |
|--|---------------------------------------------|
|  |                                             |
|  | I690 - Sequelae of subarachnoid haemorrhage |
